# Supplementary material for: Countrywide Reassessment of Schistosoma mansoni Infection in Burundi Using a Urine-Circulating Cathodic Antigen Rapid Test: Informing the National Control Program
Source: PubMed Central journal article supplement (PMC5361543; doi:10.4269/ajtmh.16-0671), 2017-03-08
Supplement: SD9.pdf [file SD9.pdf]

SUPPLEMENTAL TABLE 1  
Prevalence of *Schistosoma mansoni* infection in Burundian primary schools

| Province<br>(N = 17, as per 2012<br>administrative units) | District<br>(N = 23, as per 2012<br>administrative units) | Commune (N = 27) | Study    | School (N = 31) | School-level prevalence by Kato-Katz (%) |            |            |            |            |            | School-level prevalence by CCA (%) |                        |
|-----------------------------------------------------------|-----------------------------------------------------------|------------------|----------|-----------------|------------------------------------------|------------|------------|------------|------------|------------|------------------------------------|------------------------|
|                                                           |                                                           |                  |          |                 | 2007                                     | 2008       | 2009       | 2010       | 2011       | 2014       | 2014 trace<br>negative             | 2014 trace<br>positive |
| Bubanza                                                   | Bubanza                                                   | Musigati         | Pilot    | Ruzibira        | 1.8                                      | 0          | 13.5       | 0          | 0.3        | 0          | 0                                  | 12                     |
| Bubanza                                                   | Mpanda                                                    | Mpanda           | Pilot    | Musenyezi       | 43.5                                     | 14.8       | 2.1        | 5.4        | 0          | 0          | 12                                 | 46                     |
| Bujumbura mairie                                          | Zone nord                                                 | Buterere         | National | Buterere II     | NA                                       | 22.1       | 10.7       | NA         | 8.1        | NA         | 54                                 | 78                     |
| Bujumbura mairie                                          | Zone sud                                                  | Kanyosha         | National | Ruziba II       | NA                                       | 1.3        | 0.3        | NA         | 0.6        | 0          | 6                                  | 48                     |
| Bujumbura rural                                           | Bujumbura rural                                           | Kabezi           | National | Magara II       | NA                                       | 8          | 25.8       | NA         | 0          | 2          | 16                                 | 40                     |
| Bujumbura rural                                           | Isale                                                     | Mutimbuzi        | National | Maramvya I      | NA                                       | 42.1       | NA         | NA         | 1          | 2          | 38                                 | 90                     |
| Bururi                                                    | Matana                                                    | Mugamba          | Pilot    | Gatwe           | 0                                        | 0          | 0          | 0          | 0          | 0          | 0                                  | 18                     |
| Bururi                                                    | Matana                                                    | Mugamba          | Pilot    | Ruko            | 0                                        | 0          | 0          | 0          | 0          | 0          | 0                                  | 12                     |
| Bururi                                                    | Matana                                                    | Rutovu           | Pilot    | Condi           | 0                                        | 0          | 0          | 0.2        | 0          | 0          | 8                                  | 36                     |
| Bururi                                                    | Matana                                                    | Rutovu           | Pilot    | Gitobo          | 1                                        | 0.3        | 0.2        | 0.2        | 0          | 0          | 0                                  | 12                     |
| Bururi                                                    | Rumonge                                                   | Buyengero        | Pilot    | Kizuga/Nkizi    | 0.3                                      | 0          | 0          | 0          | 0          | 0          | 0                                  | 12                     |
| Bururi                                                    | Rumonge                                                   | Burambi          | National | Busaga          | NA                                       | 3.3        | NA         | NA         | 0          | NA         | 2                                  | 20                     |
| Bururi                                                    | Rumonge                                                   | Buyengero        | Pilot    | Mudende         | 10.7                                     | 1.6        | 0          | 0          | 0          | 0          | 0                                  | 44                     |
| Cankuzo                                                   | Cankuzo                                                   | Cankuzo          | National | Muhweza         | NA                                       | 0          | 0          | NA         | 0          | 0          | 2                                  | 44                     |
| Cibitoke                                                  | Cibitoke                                                  | Murwi            | Pilot    | Mirombero       | 2                                        | 1.6        | 15.4       | 0.5        | 0          | 4          | 4                                  | 34                     |
| Cibitoke                                                  | Cibitoke                                                  | Rugombo          | Pilot    | Munyika         | 30.4                                     | 6.3        | 5          | 4.1        | 6.4        | 20         | 38                                 | 70                     |
| Gitega                                                    | Gitega                                                    | Gitega           | National | Rutoke I        | NA                                       | 0          | 0.3        | NA         | 0          | 0          | 0                                  | 16                     |
| Karusi                                                    | Nyabikere                                                 | Gihogazi         | National | Ramba           | NA                                       | 1.7        | NA         | NA         | 0.9        | 0          | 4                                  | 16                     |
| Kayanza                                                   | Musema                                                    | Rango            | National | Karehe          | NA                                       | 0          | NA         | NA         | 0          | 0          | 0                                  | 14                     |
| Kirundo                                                   | Kirundo                                                   | Kirundo          | National | Yaranda         | NA                                       | 1.7        | 0.7        | NA         | 0          | 0          | 24                                 | 58                     |
| Makamba                                                   | Makamba                                                   | Kayogoro         | National | Mugeni          | NA                                       | 5.3        | 19.1       | NA         | 0.9        | 2          | 30                                 | 64                     |
| Makamba                                                   | Nyanza-Lac                                                | Nyanza-Lac       | National | Kabo            | NA                                       | 19         | 13         | NA         | 0.9        | 16         | 10                                 | 66                     |
| Makamba                                                   | Nyanza-Lac                                                | Vugizo           | National | Vugizo          | NA                                       | 0.7        | NA         | NA         | 1.2        | NA         | 12                                 | 42                     |
| Muyinga                                                   | Muyinga                                                   | Muyinga          | National | Musenga         | NA                                       | 0          | 0.3        | NA         | 0          | 0          | 6                                  | 36                     |
| Mwaro                                                     | Kibumbu                                                   | Kayokwe          | National | Kibogoye II     | NA                                       | 0.3        | 0          | NA         | 0          | NA         | 2                                  | 32                     |
| Ngozi                                                     | Ngozi                                                     | Busiga           | National | Mparamirundi    | NA                                       | 0          | 0          | NA         | 0          | NA         | 12                                 | 48                     |
| Rumonge                                                   | Bururi                                                    | Rumonge          | Pilot    | Nyamibu         | 55.5                                     | 20.7       | 21.6       | 12.8       | 9.1        | 4          | 26                                 | 72                     |
| Rumonge                                                   | Bururi                                                    | Rumonge          | Pilot    | Rukinga         | 7.4                                      | 0.9        | 2.3        | 4.1        | 3.6        | 6          | 30                                 | 46                     |
| Rutana                                                    | Gihofi                                                    | Giharo           | National | Muzye           | NA                                       | 3.7        | 4.5        | NA         | 0          | 0          | 0                                  | 44                     |
| Rutana                                                    | Rutana                                                    | Musongati        | National | Gisuriro        | NA                                       | 1.3        | 0.8        | NA         | 0          | 0          | 12                                 | 66                     |
| Ruyigi                                                    | Kinyinya                                                  | Kinyinya         | National | Nyamusasa       | NA                                       | 3.3        | NA         | NA         | 0          | 0          | 12.8                               | 46.2                   |
| <b>Total average</b>                                      |                                                           |                  |          |                 | <b>12.7</b>                              | <b>5.2</b> | <b>5.4</b> | <b>2.3</b> | <b>1.1</b> | <b>2.2</b> | <b>11.6</b>                        | <b>41.4</b>            |

CCA = circulating cathodic antigen point-of-care urine cassette assay; NA = not applicable, the epidemiological survey was not done in this specific year. The pilot study started in 12 schools in 2007 and 19 schools in 2008 (baseline). Children at sentinel schools were assessed annually for *S. mansoni* infection and soil-transmitted helminth infections (Kato-Katz), and the school-level prevalence was obtained.
